# Supplementary material for: Association of Major Depression With Sexual Dysfunction in Men
Source: Atypon-hosted journal article supplement (doi:10.1176/appi.neuropsych.12010004), 2013-05-17
Supplement: 308_ds001.pdf [file 308_ds001.pdf]

**DATA SUPPLEMENT TABLE 1: Percentile Rankings of DISF Total Score Above and Below 1 SD at Lower Limit of Normal Range**

| Depression              | DISF        | Group | N   | mean  | SD   | Δ Means | p value* | T-score | Percentile | N   | Ham-D-17 Baseline | Δ means | p value*     |
|-------------------------|-------------|-------|-----|-------|------|---------|----------|---------|------------|-----|-------------------|---------|--------------|
| MDD+Atypical Depression | Total Score | All   | 326 | 65.4  | 30.0 |         |          | 38      | 13th       |     |                   |         |              |
|                         |             | Above | 148 | 92.5  | 16.0 | 50      | <0.0001  | 55      | 70th       | 148 | 18.8±4.0          | 2.15    | <0.0001      |
|                         |             | Below | 178 | 42.8  | 18.1 |         |          | 27      | 1st        | 178 | 21.0±3.9          |         |              |
| MDD                     |             | All   | 91  | 49.0  | 29.4 |         | .        | 27      | 1st        |     |                   |         |              |
|                         |             | Above | 23  | 88.5  | 14.2 | 53      | <0.0001  | 54      | 66th       | 23  | 22.3±2.2          | 1.11    | 0.093        |
|                         |             | Below | 68  | 35.78 | 19.6 |         |          | 20      | 0.1th      | 68  | 23.4±2.8          |         |              |
| Atypical Depression     |             | All   | 235 | 71.7  | 28.0 |         |          | 43      | 25th       |     |                   |         |              |
|                         |             | Above | 125 | 93.3  | 16.2 | 46      | <0.0001  | 55      | 70th       | 125 | 18.2±3.9          | 1.29    | <b>0.011</b> |
|                         |             | Below | 110 | 47.2  | 15.7 |         |          | 27      | 1st        | 110 | 19.5±3.8          |         |              |

\*p value: means above versus means below

**DATA SUPPLEMENT TABLE 2: Percentile Rankings of DISF Arousal Domain Score Above and Below 1 SD at Lower Limit of Normal Range**

| Depression              | DISF    | Group | N   | Mean | SD  | Δ means | p value* | T-score | Percentile | N   | Ham-D-17 baseline | Δ means | p value* |
|-------------------------|---------|-------|-----|------|-----|---------|----------|---------|------------|-----|-------------------|---------|----------|
| MDD+Atypical Depression | Arousal | All   | 326 | 13.2 | 8.5 |         |          | 51      | 51st       |     |                   |         |          |
|                         |         | Above | 215 | 18.1 | 6.0 | 14.3    | <0.0001  | 67      | 95th       | 215 | 19.5±4.1          | 1.61    | <0.0007  |
|                         |         | Below | 111 | 3.8  | 2.9 |         |          | 23      | 0.4th      | 111 | 21.1±3.9          |         |          |
| MDD                     |         | All   | 91  | 10.8 | 8.7 |         | .        | 39      | 14th       |     |                   |         |          |
|                         |         | Above | 48  | 17.5 | 6.3 | 14.2    | <0.0001  | 63      | 91st       | 48  | 22.9±2.8          | 0.59    | 0.309    |
|                         |         | Below | 43  | 3.3  | 2.9 |         |          | 20      | 0.1th      | 43  | 23.4±2.7          |         |          |
| Atypical Depression     |         | All   | 235 | 14.2 | 8.3 |         |          | 53      | 63rd       |     |                   |         |          |
|                         |         | Above | 167 | 18.3 | 5.9 | 12.7    | <0.0001  | 72      | 99th       | 167 | 18.5±3.9          | 1.09    | 0.052    |
|                         |         | Below | 68  | 4.1  | 2.9 |         |          | 24      | 1st        | 68  | 19.6±3.7          |         |          |

\*p value: means above vs. means below

**DATA SUPPLEMENT TABLE 3: Percentile Rankings of DISF Behavior Domain Score Above and Below 1 SD at Lower Limit of Normal Range**

| Depression              | DISF     | Group | N   | Mean | SD  | Δ means | p value* | T-score | Percentile | N   | Ham-D-17 baseline | Δ means | p value*      |
|-------------------------|----------|-------|-----|------|-----|---------|----------|---------|------------|-----|-------------------|---------|---------------|
| MDD+Atypical Depression | Behavior | All   | 326 | 9.4  | 6.7 |         |          | 41      | 18th       |     |                   |         |               |
|                         |          | Above | 155 | 15.1 | 5.2 | 10.8    | <0.0001  | 53      | 67th       | 155 | 19.3±4.1          | 1.27    | <b>0.0051</b> |
|                         |          | Below | 171 | 4.3  | 2.6 |         |          | 32      | 4th        | 171 | 20.6±4.0          |         |               |
| MDD                     |          | All   | 91  | 7.54 | 6.2 |         |          | 36      | 8th        |     |                   |         |               |
|                         |          | Above | 35  | 14.0 | 4.5 | 10.5    | <0.0001  | 51      | 53rd       | 35  | 22.7±2.5          | 0.68    | 0.2515        |
|                         |          | Below | 56  | 3.5  | 2.8 |         |          | 31      | 3rd        | 56  | 23.4±2.9          |         |               |
| Atypical Depression     |          | All   | 235 | 10.1 | 6.8 |         |          | 41      | 19th       |     |                   |         |               |
|                         |          | Above | 120 | 15.4 | 5.3 | 10.7    | <0.0001  | 53      | 63rd       | 120 | 18.4±3.9          | 0.89    | 0.0778        |
|                         |          | Below | 115 | 4.6  | 2.4 |         |          | 32      | 4th        | 115 | 19.2±3.8          |         |               |

\*p value: means above versus means below

**DATA SUPPLEMENT TABLE 4: Percentile Rankings of DISF Desire (Cognition/Fantasy) Domain Score Above and Below 1 SD of Lower Limit of Normal Range**

| Depression              | DISF   | Group | N   | Mean | SD   | Δ means | p value* | T-score | Percentile | N   | Ham-D-17 baseline | Δ means | p value*      |
|-------------------------|--------|-------|-----|------|------|---------|----------|---------|------------|-----|-------------------|---------|---------------|
| MDD+Atypical Depression | Desire | All   | 326 | 22.5 | 11.7 |         |          | 49      | 45th       |     |                   |         |               |
|                         |        | Above | 245 | 27.6 | 8.3  | 20.7    | <0.0001  | 55      | 69th       | 245 | 19.6±4.1          | 1.68    | <b>0.0013</b> |
|                         |        | Below | 81  | 6.9  | 4.4  |         |          | 33      | 5th        | 81  | 21.3±3.9          |         |               |
| MDD                     |        | All   | 91  | 19.5 | 12.0 |         |          | 43      | 25th       |     |                   |         |               |
|                         |        | Above | 60  | 26.4 | 8.6  | 20.0    | <0.0001  | 52      | 55th       | 60  | 22.9±2.7          | 0.73    | 0.2296        |
|                         |        | Below | 31  | 6.4  | 4.1  |         |          | 34      | 6th        | 31  | 23.6±2.8          |         |               |
| Atypical Depression     |        | All   | 235 | 23.6 | 11.4 |         |          | 49      | 47th       |     |                   |         |               |
|                         |        | Above | 185 | 28.0 | 8.2  | 20.8    | <0.0001  | 54      | 68th       | 185 | 18.5±3.9          | 1.29    | <b>0.0374</b> |
|                         |        | Below | 50  | 7.2  | 4.5  |         |          | 35      | 7th        | 50  | 19.8±3.8          |         |               |

\*p value: means above versus means below

**DATA SUPPLEMENT TABLE 5: Percentile Rankings of DISF Drive/Relationship Domain Score Above and Below 1 SD of Lower Limit of Normal Range**

| Depression              | DISF  | Group | N   | Mean  | SD  | Δ means | p value* | T-score | Percentile | N   | Ham-D-17 baseline | Δ means | p value* |
|-------------------------|-------|-------|-----|-------|-----|---------|----------|---------|------------|-----|-------------------|---------|----------|
| MDD+Atypical Depression | Drive | All   | 326 | 9.5   | 5.3 |         |          | 33      | 5th        |     |                   |         |          |
|                         |       | Above | 122 | 15.0  | 2.6 | 8.2     | <0.0001  | 49      | 49th       | 122 | 18.5±4.2          | 2.44    | <0.0001  |
|                         |       | Below | 204 | 6.2   | 3.5 |         |          | 25      | 1st        | 204 | 20.9±3.8          |         |          |
| MDD                     |       | All   | 91  | 3.8   | 3.2 |         |          | 20      | 0.1th      |     |                   |         |          |
|                         |       | Above | 2   | 12.0- | 0   | 8.4     | 0.0001   |         |            | 2   | 21.0±1.4          | 2.18    | 0.2671   |
|                         |       | Below | 89  | 3.6   | 3.0 |         |          | 20      | 0.1th      | 89  | 23.2±2.7          |         |          |
| Atypical Depression     |       | All   | 235 | 11.7  | 4.2 |         |          | 39      | 14th       |     |                   |         |          |
|                         |       | Above | 120 | 15.1  | 2.6 | 6.9     | <0.0001  | 51      | 53rd       | 120 | 18.4±4.2          | 0.72    | 0.154    |
|                         |       | Below | 115 | 8.2   | 2.3 |         |          | 29      | 2nd        | 115 | 19.1±3.5          |         |          |

\*p value: means above versus means below

**DATA SUPPLEMENT TABLE 6: Percentile Rankings of DISF Orgasm Domain Score Above and Below 1 SD of Lower Limit of Normal Range**

| Depression              | DISF   | Group | N   | Mean | SD  | Δ means | p value* | T-score | Percentile | N   | Ham-D-17 baseline | Δ means | p value* |
|-------------------------|--------|-------|-----|------|-----|---------|----------|---------|------------|-----|-------------------|---------|----------|
| MDD+Atypical Depression | Orgasm | All   | 326 | 10.8 | 6.5 |         |          | 30      | 2nd        |     |                   |         |          |
|                         |        | Above | 108 | 17.9 | 3.3 | 10.7    | <0.0001  | 53      | 63rd       | 108 | 18.3±4.0          | 2.49    | <0.0001  |
|                         |        | Below | 218 | 7.3  | 4.5 |         |          | 24      | 05th       | 218 | 20.8±4.0          |         |          |
| MDD                     |        | All   | 91  | 7.4  | 6.0 |         |          | 24      | 0.5th      |     |                   |         |          |
|                         |        | Above | 15  | 17.1 | 2.4 | 11.6    | <0.0001  | 52      | 55th       | 15  | 21.6±1.8          | 1.83    | 0.0167   |
|                         |        | Below | 76  | 5.5  | 4.4 |         |          | 20      | 0.1st      | 76  | 23.4±2.8          |         |          |
| Atypical Depression     |        | All   | 235 | 12.1 | 6.2 |         |          | 35      | 7th        |     |                   |         |          |
|                         |        | Above | 93  | 18.0 | 3.4 | 9.8     | <0.0001  | 54      | 68th       | 93  | 17.8±4.0          | 1.62    | 0.0016   |
|                         |        | Below | 142 | 8.2  | 4.3 |         |          | 26      | 7th        | 142 | 19.4±3.7          |         |          |

\*p value: means above versus means below

**DATA SUPPLEMENT TABLE 7: Effect of Severity and Type of Depression on DISF Arousal Domain Score**

|                         |     |                     |                |          |          | DISF Arousal Score      |             |                     |
|-------------------------|-----|---------------------|----------------|----------|----------|-------------------------|-------------|---------------------|
| n                       |     |                     | Ham-D-17 Score |          | Category | MDD+Atypical Depression | MDD         | Atypical Depression |
| MDD+Atypical Depression | MDD | Atypical Depression |                | means±SD |          | means±SD                | means±SD    | means±SD            |
| 121                     | 0   | 121                 | ≤ 18           | 17.8±3.6 | mild     | 14.0±8.0                | no patients | 14.0±8.0            |
| 118                     | 47  | 71                  | 19–22          | 20.0±2.8 | moderate | 12.9±8.5                | 12.1±10.0   | 13.5±7.3            |
| 56                      | 25  | 31                  | 23–25          | 22.1±3.9 | severe   | 12.8±8.9                | 10.7±6.7    | 14.5±10.1           |
| 31                      | 19  | 12                  | 26–33          | 24.8±4.5 | extreme  | 12.2±9.9                | 7.7±6.6     | 19.2±10.3           |

**DATA SUPPLEMENT TABLE 8: Effect of Severity and Type of Depression on DISF Behavior Domain Score**

|                         |     |                     |                |          |          | DISF Behavior Score     |             |                     |
|-------------------------|-----|---------------------|----------------|----------|----------|-------------------------|-------------|---------------------|
| n                       |     |                     | Ham-D-17 Score |          | Category | MDD+Atypical Depression | MDD         | Atypical Depression |
| MDD+Atypical Depression | MDD | Atypical Depression |                | means±SD |          | means±SD                | means±SD    | means±SD            |
| 121                     | 0   | 121                 | ≤ 18           | 17.8±3.6 | mild     | 9.8±6.8                 | no patients | 9.8±6.8             |
| 118                     | 47  | 71                  | 19–22          | 20.0±2.8 | moderate | 9.4±6.3                 | 7.9±6.9     | 10.3±5.7            |
| 56                      | 25  | 31                  | 23–25          | 22.1±3.9 | severe   | 9.3±7.0                 | 8.2±5.0     | 10.2±8.2            |
| 31                      | 19  | 12                  | 26–33          | 24.8±4.5 | extreme  | 7.9±7.6                 | 5.6±6.3     | 11.7±8.8            |

**DATA SUPPLEMENT TABLE 9: Effect of Severity and Type of Depression on DISF Desire (Cognition/Fantasy) Domain Score**

|                         |     |                     |                |          |          | DISF Desire Score       |             |                     |
|-------------------------|-----|---------------------|----------------|----------|----------|-------------------------|-------------|---------------------|
| N                       |     |                     | Ham-D-17 Score |          | Category | MDD+Atypical Depression | MDD         | Atypical Depression |
| MDD+Atypical Depression | MDD | Atypical Depression |                |          |          |                         |             |                     |
| 121                     | 0   | 121                 | ≤ 18           | 17.8±3.6 | mild     | 24.1±11.4               | no patients | 24.0±11.2           |
| 118                     | 47  | 71                  | 19–22          | 20.0±2.8 | moderate | 21.7±11.1               | 19.5±12.3   | 25.2±10.5           |
| 56                      | 25  | 31                  | 23–25          | 22.1±3.9 | severe   | 22.1±11.9               | 20.2±11.1   | 20.0±13.2           |
| 31                      | 19  | 12                  | 26–33          | 24.8±4.5 | extreme  | 19.6±14.2               | 16.1±12.7   | 19.3±12.9           |

**DATA SUPPLEMENT TABLE 10: Effect of Severity and Type of Depression on DISF Drive/Relationship Domain Score**

|                         |     |                     |                |          |          | DISF Drive Score        |             |                     |
|-------------------------|-----|---------------------|----------------|----------|----------|-------------------------|-------------|---------------------|
| n                       |     |                     | Ham-D-17 Score |          | Category | MDD+Atypical Depression | MDD         | Atypical Depression |
| MDD+Atypical Depression | MDD | Atypical Depression |                | means±SD |          | means±SD                | means±SD    | means±SD            |
| 121                     | 0   | 121                 | ≤ 18           | 17.8±3.6 | mild     | 11.4±3.9                | no patients | 11.4±3.9            |
| 118                     | 47  | 71                  | 19–22          | 20.0±2.8 | moderate | 8.7±5.5                 | 3.9±3.6     | 11.9±4.1            |
| 56                      | 25  | 31                  | 23–25          | 22.1±3.9 | severe   | 8.3±6.0                 | 3.9±2.7     | 11.9±5.5            |
| 31                      | 19  | 12                  | 26–33          | 24.8±4.5 | extreme  | 7.3±6.1                 | 3.3±2.9     | 13.6±4.0            |

**DATA SUPPLEMENT TABLE 11: Effect of Severity and Type of Depression on DISF Orgasm Domain Score**

|                         |     |                     |                |          |          | DISF Orgasm Score       |             |                     |
|-------------------------|-----|---------------------|----------------|----------|----------|-------------------------|-------------|---------------------|
| N                       |     |                     | Ham-D-17 Score |          | Category | MDD+Atypical Depression | MDD         | Atypical Depression |
| MDD+Atypical Depression | MDD | Atypical Depression |                | means±SD |          | means±SD                | means±SD    | means±SD            |
| 121                     | 0   | 121                 | ≤ 18           | 17.8±3.6 | mild     | 11.6±6.0                | no patients | 11.6±6.0            |
| 118                     | 47  | 71                  | 19–22          | 20.0±2.8 | moderate | 10.9±6.5                | 8.0±6.5     | 12.7±5.8            |
| 56                      | 25  | 31                  | 23–25          | 22.1±3.9 | severe   | 10.4±6.9                | 8.0±5.1     | 12.3±7.6            |
| 31                      | 19  | 12                  | 26–33          | 24.8±4.5 | extreme  | 8.4±6.1                 | 5.3±5.5     | 13.3±7.3            |
